# Supplementary material for: Is political ideology correlated with brain structure? A preregistered replication
Source: PubMed Central journal article supplement (PMC11519434; doi:10.1016/j.isci.2024.110532), 2024-09-19
Supplement: mmc1.pdf [file mmc1.pdf]

**iScience, Volume 27**

**Supplemental information**

**Is political ideology correlated with brain  
structure? A preregistered replication**

**Diamantis Petropoulos Petalas, Gijs Schumacher, and Steven H. Scholte**

## Table S1

### *Summary Statistics*

| Variable                                              | N   | Mean | Std. Dev. | Min | Pctl. 25 | Median | Pctl. 75 | Max |
|-------------------------------------------------------|-----|------|-----------|-----|----------|--------|----------|-----|
| Homosexuals should be removed from society            | 964 | 1.2  | 0.64      | 1   | 1        | 1      | 1        | 5   |
| Homosexuals should live their life as they please (R) | 964 | 1.5  | 0.88      | 1   | 1        | 1      | 2        | 5   |
| Unnatural for women to lead                           | 964 | 1.5  | 0.89      | 1   | 1        | 1      | 2        | 5   |
| Women should raise children                           | 964 | 2.6  | 1.2       | 1   | 2        | 3      | 4        | 5   |
| Differences in possession                             | 964 | 3.1  | 0.96      | 1   | 2        | 3      | 4        | 5   |
| Differences in income                                 | 964 | 2.9  | 1.1       | 1   | 2        | 3      | 4        | 5   |
| Sharing of profit                                     | 964 | 3    | 0.99      | 1   | 2        | 3      | 4        | 5   |
| Taxation of higher incomes                            | 964 | 2.5  | 0.93      | 1   | 2        | 2      | 3        | 5   |

**Table S2***Parties and vote choice in the sample and in the population*

| Party name   | Description            | Social ideology<br>(0-10) | Economic ideology<br>(0-10) | Vote choice<br>2010 | Sample |
|--------------|------------------------|---------------------------|-----------------------------|---------------------|--------|
| CDA          | Christian democratic   | 7.1                       | 6.5                         | 13.6%               | 2.2%   |
| Christenunie | Christian social       | 7.4                       | 5                           | 3.2%                | 2.6%   |
| D66          | Social-liberal         | 1.6                       | 5.5                         | 7%                  | 16.9%  |
| Groenlinks   | Green                  | 1.9                       | 3                           | 6.7%                | 13.8%  |
| PvdD         | Animal-rights          | 3.8                       | 3.6                         | 1.3%                | 5.1%   |
| PvdA         | Social democratic      | 4                         | 3.6                         | 19.6%               | 18.4%  |
| PVV          | Radical right          | 7.2                       | 5.2                         | 15.5%               | 15.8%  |
| SGP          | Christian conservative | 9.3                       | 6.5                         | 1.7%                | 1.5%   |
| SP           | Socialist              | 5.2                       | 1.5                         | 9.8%                | 4.1%   |
| Trots        | Radical right          | na                        | na                          | 0.6%                | 0.4%   |
| VVD          | Conservative-liberal   | 4.8                       | 8.3                         | 20.5%               | 17.1%  |

*Note: the social and economic ideology and the vote choice variables stem from the Chapel Hill Expert Survey<sup>11</sup>; Sample refers to vote choice from participants in our study.*

**Table S3***OLS regression coefficients predicting amygdala gray matter volume*

|                         | (1)                   | (2)                   | (3)                   |
|-------------------------|-----------------------|-----------------------|-----------------------|
| Social identity         | 5.024*<br>(2.460)     | 5.135*<br>(2.474)     |                       |
| Economic identity       |                       | -1.093<br>(2.457)     |                       |
| Social ideology         |                       |                       | -2.125<br>(2.442)     |
| Economic ideology       |                       |                       | 1.029<br>(2.477)      |
| Constant                | 663.250***<br>(2.457) | 663.270***<br>(2.459) | 663.288***<br>(2.464) |
| Observations            | 900                   | 900                   | 900                   |
| R <sup>2</sup>          | 0.005                 | 0.005                 | 0.001                 |
| Adjusted R <sup>2</sup> | 0.004                 | 0.003                 | -0.001                |
| Residual Std. Error     | 73.720 (df = 898)     | 73.753 (df = 897)     | 73.896 (df = 897)     |
| F Statistic             | 4.170* (df = 1; 898)  | 2.182 (df = 2; 897)   | 0.450 (df = 2; 897)   |

*Note: The first model is the basic replication. The second model is a robustness check including the economic ideology-as-identity variable. The third model includes both ideology-as-issues variables. We opted here a single model including both variables rather than two separate models, because the effect sizes are nearly similar, and always insignificant. \* $p < 0.05$ ; \*\* $p < 0.01$ ; \*\*\* $p < 0.001$*

**Table S4***OLS regression coefficients predicting ACC gray matter volume*

|                         | (1)                   | (2)                   | (3)                   |
|-------------------------|-----------------------|-----------------------|-----------------------|
| Social identity         | 0.202<br>(0.497)      | 0.179<br>(0.500)      |                       |
| Economic identity       |                       | 0.227<br>(0.497)      |                       |
| Social ideology         |                       |                       | 0.383<br>(0.492)      |
| Economic ideology       |                       |                       | 0.523<br>(0.499)      |
| Constant                | 329.130***<br>(0.497) | 329.126***<br>(0.497) | 329.121***<br>(0.497) |
| Observations            | 900                   | 900                   | 900                   |
| R <sup>2</sup>          | 0.0002                | 0.0004                | 0.002                 |
| Adjusted R <sup>2</sup> | -0.001                | -0.002                | -0.0003               |
| Residual Std. Error     | 14.902 (df = 898)     | 14.908 (df = 897)     | 14.897 (df = 897)     |
| F Statistic             | 0.165 (df = 1; 898)   | 0.187 (df = 2; 897)   | 0.887 (df = 2; 897)   |

*Note: The first model is the basic replication. The second model is a robustness check including the economic ideology-as-identity variable. The third model includes both ideology-as-issues variables. We opted here a single model including both variables rather than two separate models, because the effect sizes are nearly similar, and always insignificant. \* $p < 0.05$ ; \*\* $p < 0.01$ ; \*\*\* $p < 0.001$*

**Figure S1**

*OLS regression coefficients of ideology on area volume*

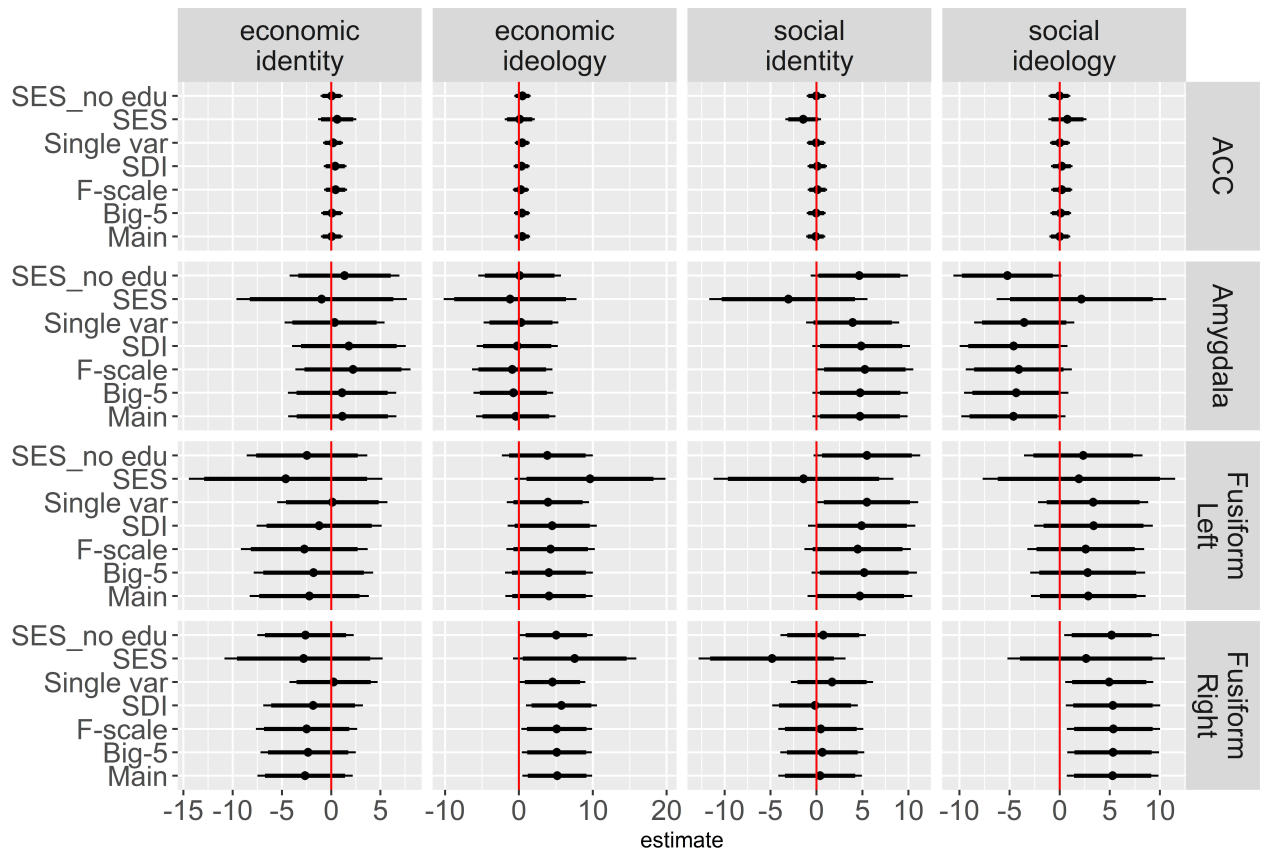

*Note: Each row represents a single OLS regression. The row label indicates which variables we add to the basic equation of volume area = social identity + social ideology + economic identity + economic ideology. "SES" stands for socio-economic background variables (education, income and gender). With "SES no edu" we remove education because we only have 349 observations for that variable. The label "single var" is different, here we ran the analyses per area with only one independent variable. Main represents the main analysis reported in the paper.*
